# Supplementary material
Source: PubMed Central journal article supplement (PMC11027955)

**Supplementary Figure 1: Flow cytometry gating strategy CD8 T cells, Macrophages and MDSC**

**CD8 Gating Strategy**

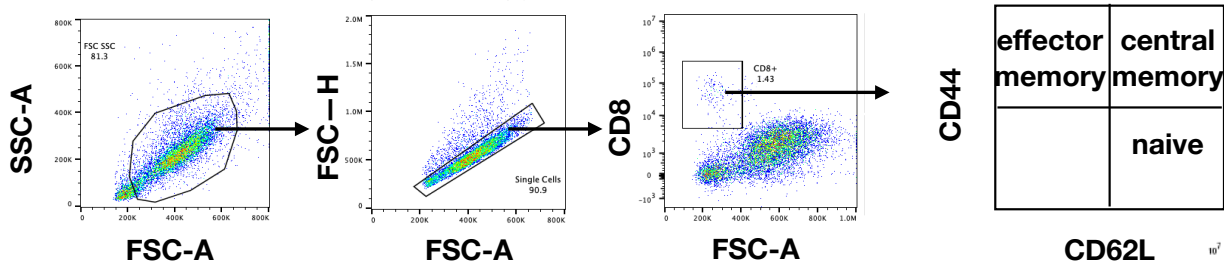

**Macrophage Analysis Gating Strategy**

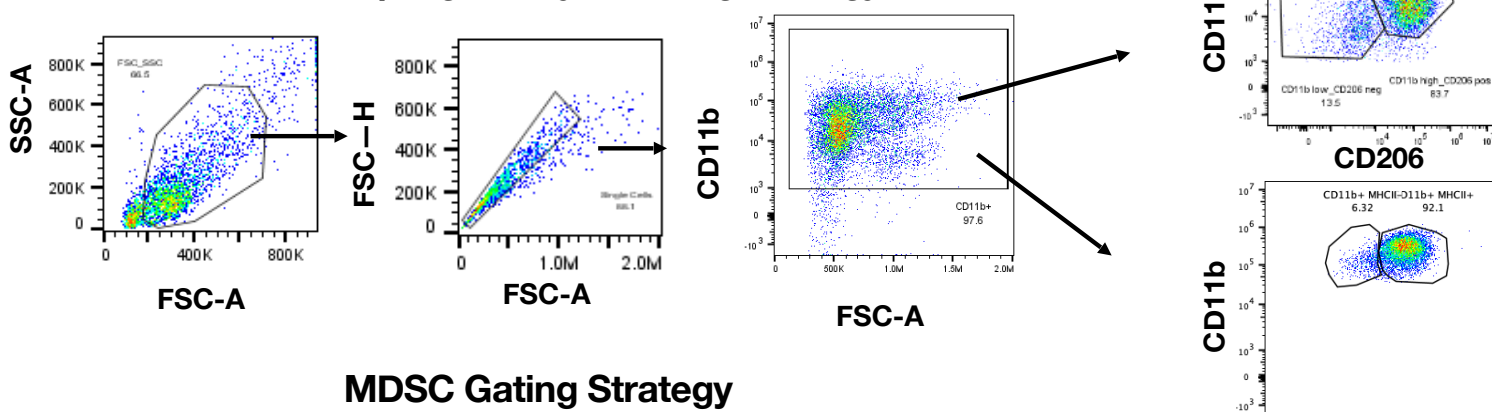

**MDSC Gating Strategy**

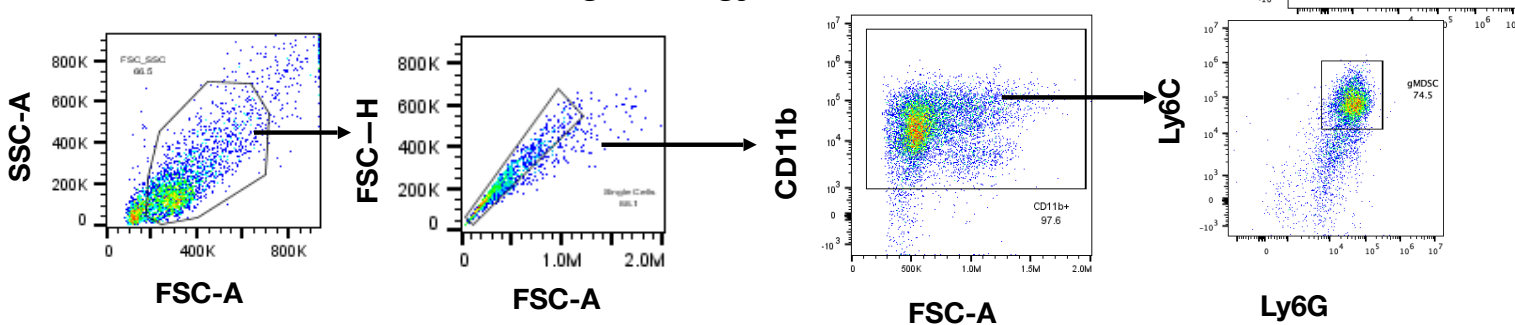

Supplement: NIHMS1952165-supplement-1.pdf [file NIHMS1952165-supplement-1.pdf]
