# Supplementary material
Source: PubMed Central journal article supplement (PMC11027955)

**Supplementary Figure 2:** Diagram showing major immune phenotypes in each phase of ovarian tumor progression.

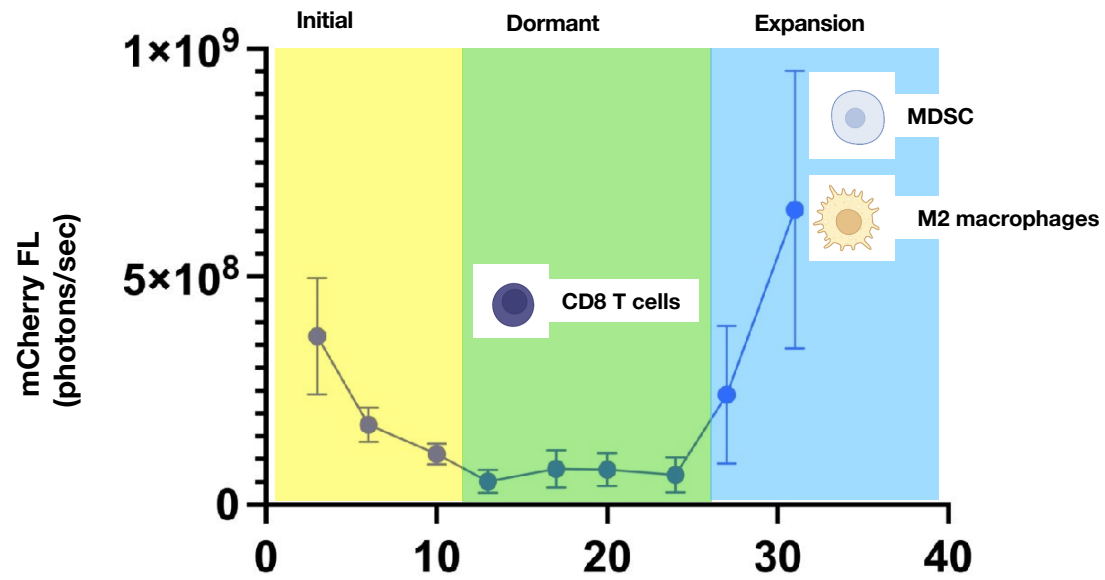

Supplement: NIHMS1952165-supplement-2.pdf [file NIHMS1952165-supplement-2.pdf]
