# Supplementary material
Source: PubMed Central journal article supplement (PMC11027955)
Supplement: NIHMS1952165-supplement-3.pdf [file NIHMS1952165-supplement-3.pdf]

**Supplementary Figure 3:** A. Diagram of CARG-2020 vector and GFP control vector; B. TKO mouse ovarian cancer cells were treated in vitro with PBS Control or 1x10<sup>5</sup> PFU/cell of CARG-2020 for 24h. IL12 mRNA was quantified by qPCR and secreted IL-12p40 and p70 protein were quantified using xMAP technology; C. Expression of IL-12 and IL-17R ECD were detected by western blot analysis in total cell lysate. D. Secretion of IL-17R ECD was detected by western blot analysis in the supernatant of cells treated with CARG-2020. Control cells were treated with VLV-GFP vector. Representative imagine of 3 independent experiments.; E. Expression of PDL-1 following treatment with CARG-2020. Note the time dependent decrease on PDL-1 expression on cells treated with CARG-2020. Control=VLV GFP. Representative imagine of 3 independent experiments.

**A**

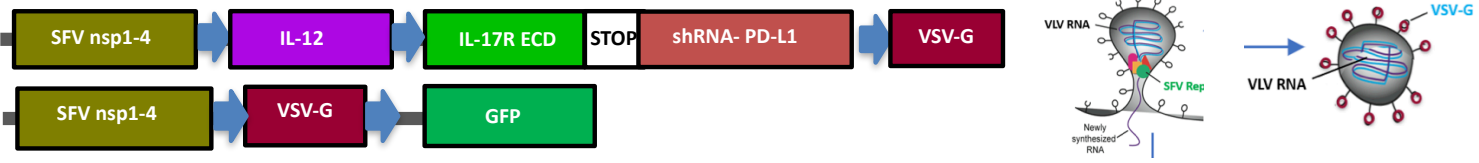

**B**

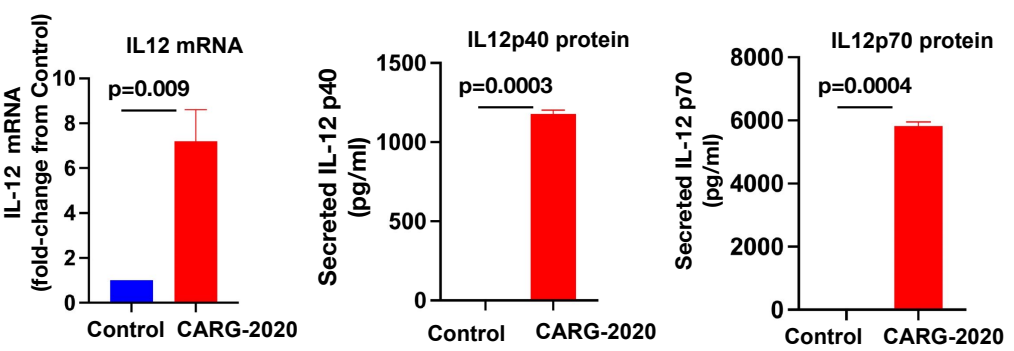

**C**

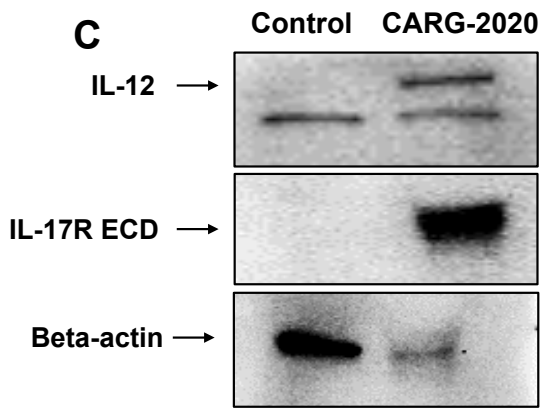

**D**

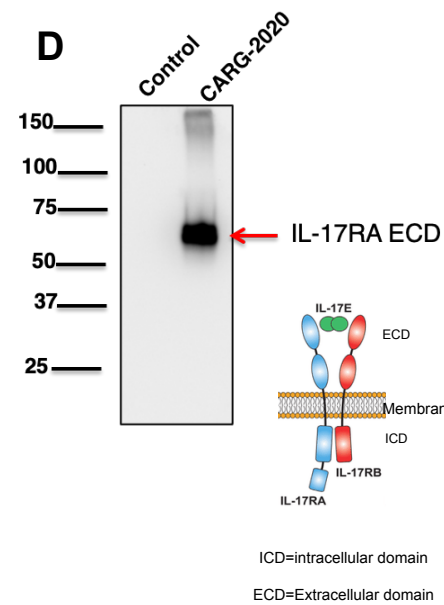

**E**

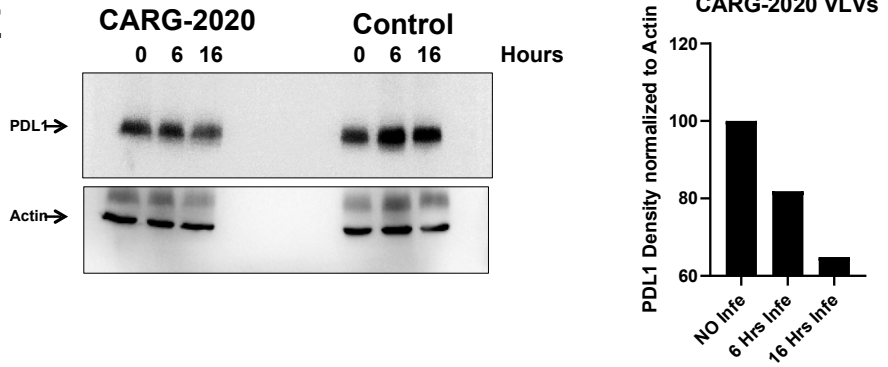

**F**

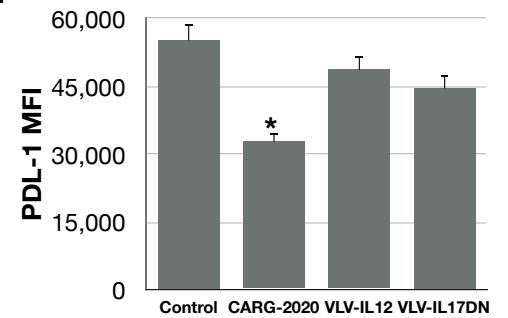

ICD=intracellular domain  
ECD=Extracellular domain
