# Supplementary material
Source: PubMed Central journal article supplement (PMC11027955)

**Supplementary Figure 4:** A. TKO mouse ovarian cancer cells were treated with increasing concentrations of CARG-2020 or VLV-GFP and effect on cell growth and cell death is quantified in real time using Cyation5/Biospa by measuring mCherry confluence and Celltox<sup>TM</sup> fluorescence; B. Representative fluorescence images showing PBS Control and CARG-2020-treated cultures. red, mCherry; green, Celltox<sup>TM</sup>; C. Human ovarian cancer cells, clone OCSC1-F2 and the hTERT-immortalized human endometrial stromal cells were treated with increasing concentrations of CARG-2020 for 72h and cell death was quantified using Celltox<sup>TM</sup> fluorescence. Note that CARG-2020 induces cell death only in cancer cells and not in normal cells.

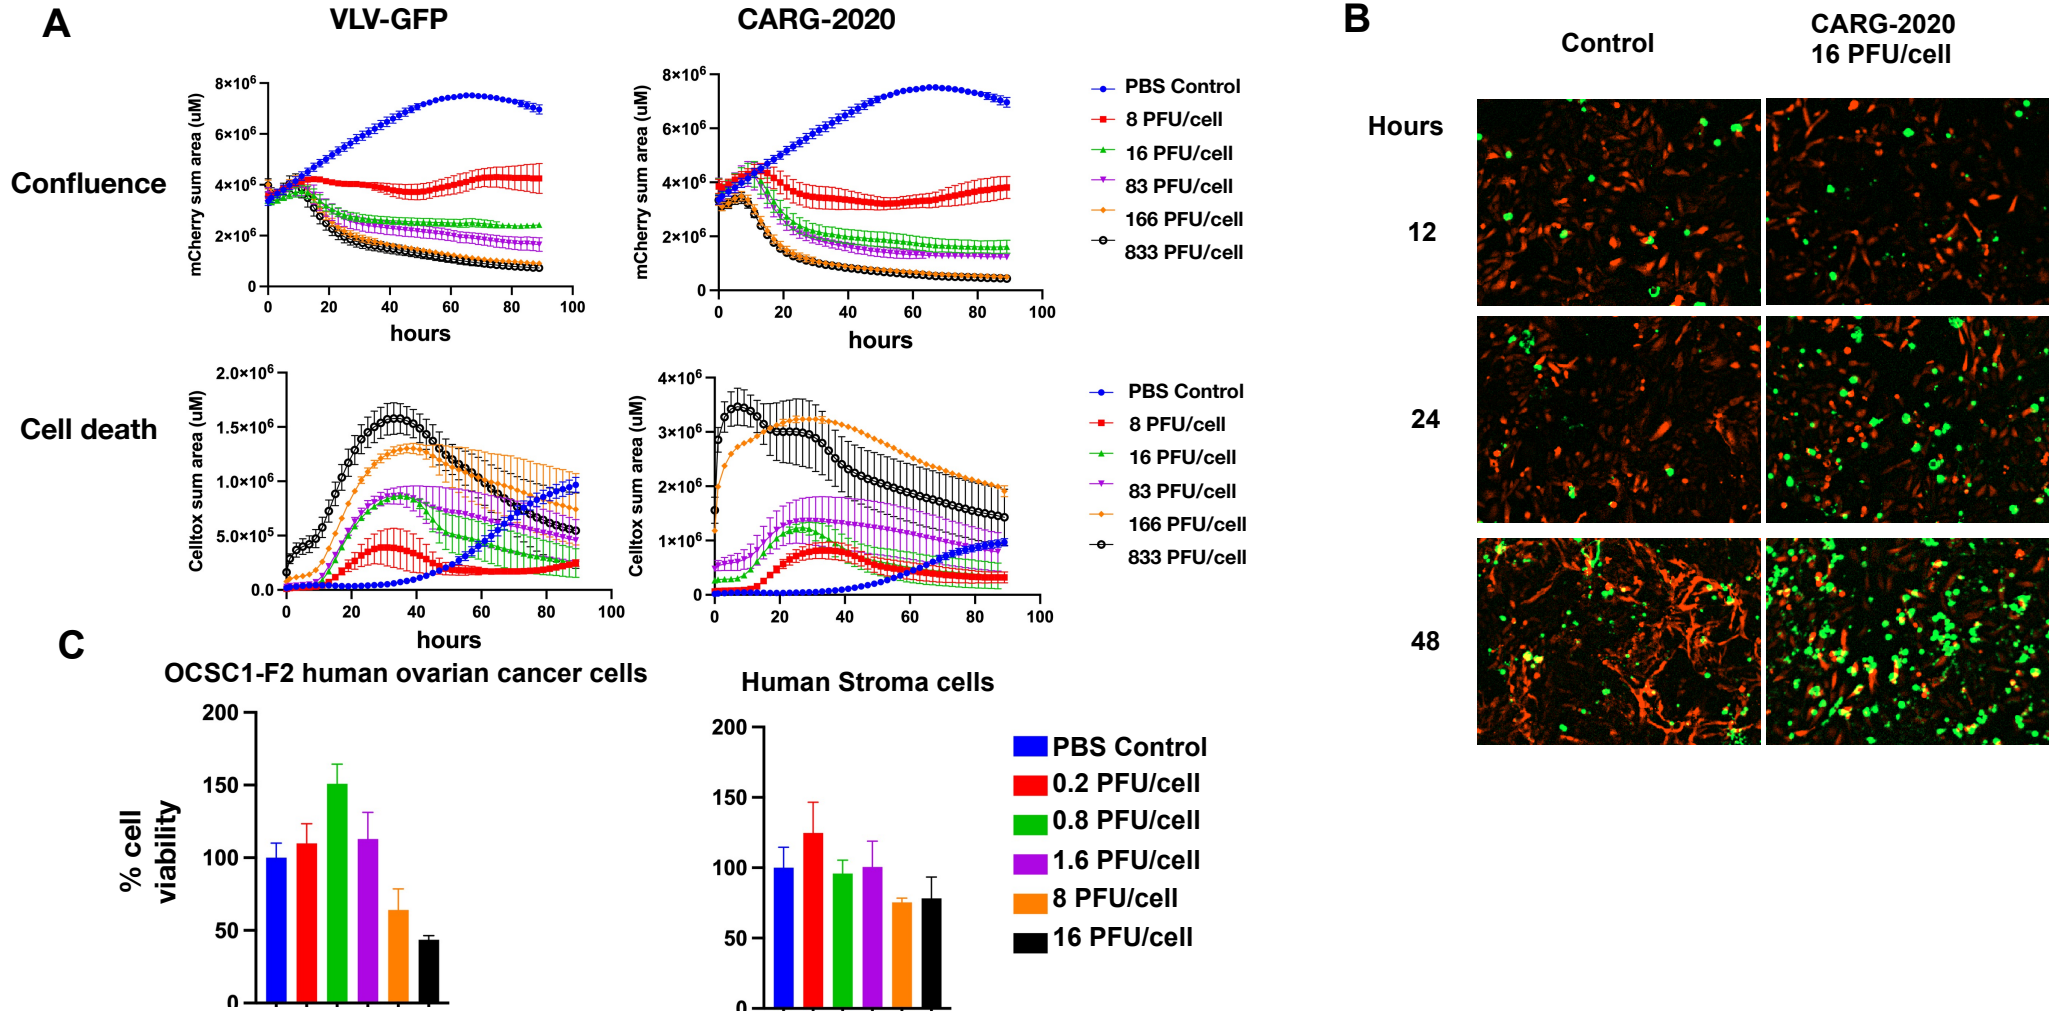

Supplement: NIHMS1952165-supplement-4.pdf [file NIHMS1952165-supplement-4.pdf]
