# Supplementary material
Source: PubMed Central journal article supplement (PMC11027955)

**Supplementary Figure 5:** A. Cytolytic effect of VLV-GFP in cancer cells is mediated by the induction of pro-apoptotic genes. Treatment of cancer cells with VLV-GFP is associated with a significant increase on TRAIL and FAS mRNA expression.  $*=p>0.005$ ;  $**= p>0.001$ ; B. In vivo induction of pro-apoptotic genes. Mice bearing mCherry-TKO tumors were treated 2X with VLV-GFP. The expression of TRAIL and FAS was determined 24h after the last treatment. Note the significant increase on TRAIL and FAS mRNA expression following VLV-GFP treatment.  $***= p>0.0001$

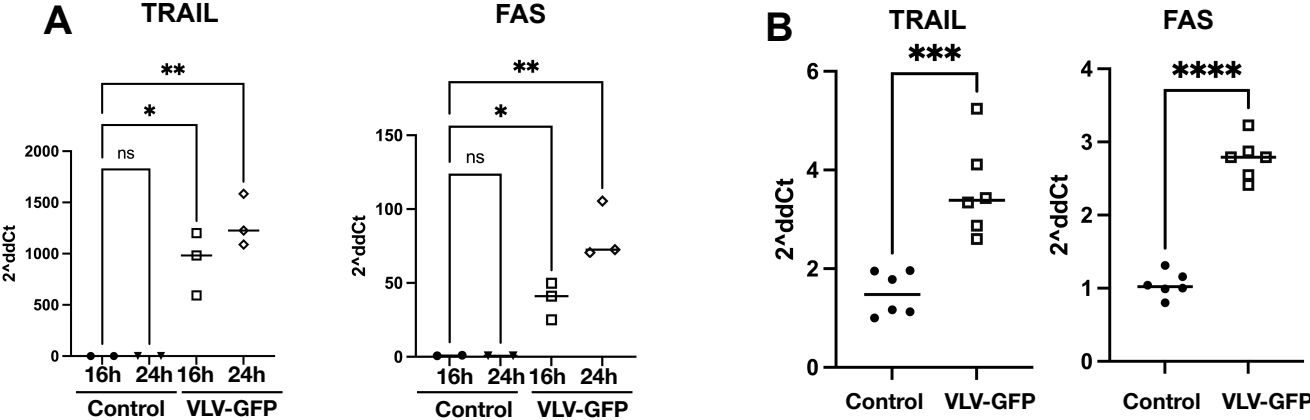

Supplement: NIHMS1952165-supplement-5.pdf [file NIHMS1952165-supplement-5.pdf]
