# Supplementary material
Source: PubMed Central journal article supplement (PMC11027955)

**Supplementary Figure 7:** A. Mean tumor burden over time of nude mice bearing OCSC1-F2 human ovarian tumors. mCherry fluorescent ROI was used to provide a measure of tumor burden. Data are presented as mean  $\pm$  SEM. Treatments began on day 6 and continued through to day 12; B. Survival analysis using Kaplan-Meier.

**A**

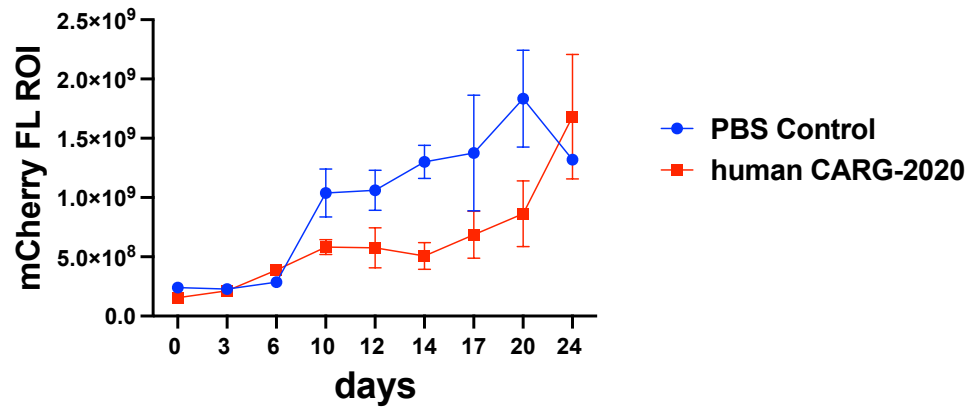

**B**

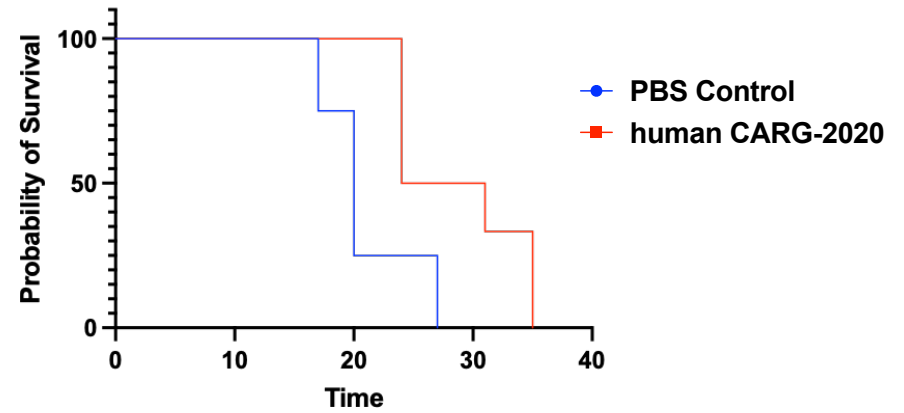

Supplement: NIHMS1952165-supplement-7.pdf [file NIHMS1952165-supplement-7.pdf]
